# Genome-wide risk prediction of primary open-angle glaucoma across multiple ancestries

Puya Gharahkhani<sup>1</sup>, Weixiong He<sup>1</sup>, Xikun Han<sup>1</sup>, Jue Sheng Ong<sup>1</sup>, Miguel E Rentería<sup>1</sup>, Janey L Wiggs<sup>2</sup>, Anthony P Khawaja<sup>3</sup>, Maciej Trzaskowski<sup>4</sup>, David A. Mackey<sup>5</sup>, Jamie E. Craig<sup>6</sup>, Alex W. Hewitt<sup>7</sup>, IGGC International Glaucoma Genetics Consortium, Stuart MacGregor<sup>1\*</sup>, Yeda Wu<sup>1\*</sup>

<sup>1</sup>QIMR Berghofer Medical Research Institute, Brisbane, Queensland, 4029, Australia

<sup>2</sup>Department of Ophthalmology, Massachusetts Eye and Ear, Harvard Medical School, Boston, MA, USA

<sup>3</sup>NIHR Biomedical Research Centre, Moorfields Eye Hospital NHS Foundation Trust and UCL Institute of Ophthalmology, London, UK

<sup>4</sup>Max Kelsen, Brisbane, QLD, Australia.

<sup>5</sup>University of Western Australia Centre for Ophthalmology and Visual Science, Perth, WA, Australia.

<sup>6</sup>Flinders University, Adelaide, SA, Australia.

<sup>7</sup>University of Tasmania, Hobart, TAS, Australia.

\*Correspondence to Yeda Wu ([yeda.wu@uq.net.au](mailto:yeda.wu@uq.net.au)) and Stuart MacGregor ([Stuart.MacGregor@qimrberghofer.edu.au](mailto:Stuart.MacGregor@qimrberghofer.edu.au))

## Withdrawal statement

This manuscript has been withdrawn by medRxiv following a formal request by the QIMR Berghofer Medical Research Institute Research Integrity Office owing to lack of author consent.
